# Supplementary material
Source: PubMed Central journal article supplement (PMC1172239)

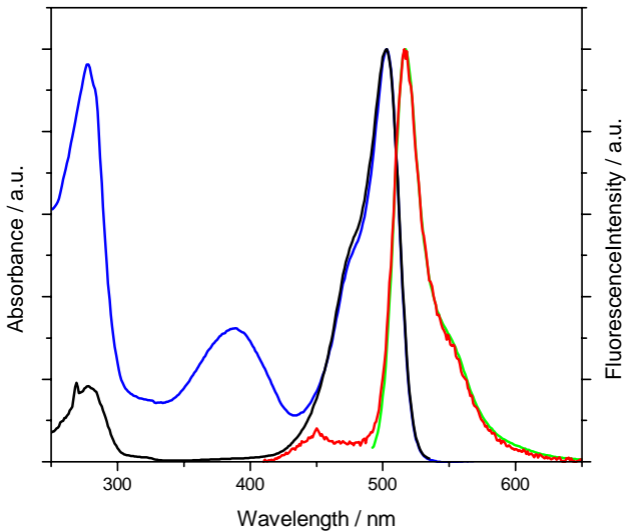

Supplement: pnas_0500489102_2.pdf [file pnas_0500489102_2.pdf]

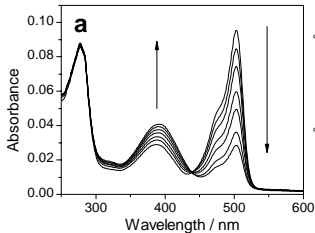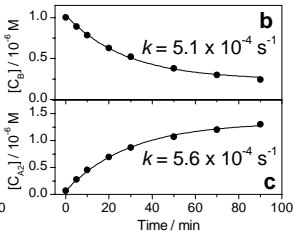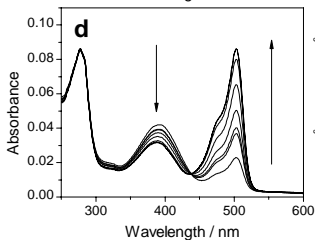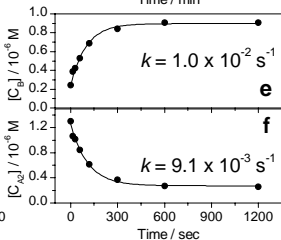

Supplement: pnas_0500489102_3.pdf [file pnas_0500489102_3.pdf]

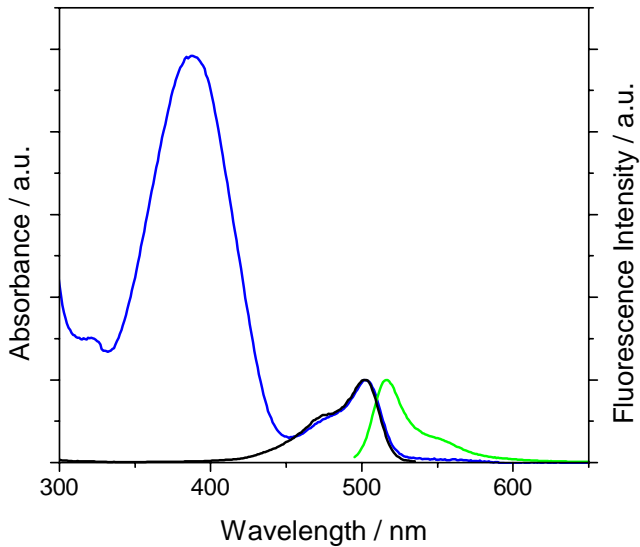

Supplement: pnas_0500489102_4.pdf [file pnas_0500489102_4.pdf]
